# Supplementary material for: A Systems‑Oriented Bibliometric and Qualitative Synthesis of Sustainable Construction for Climate‑Resilient Smart Cities in the Global South
Source: Research Square preprint supplement (doi:10.21203/rs.3.rs-8405644/v1), 2026-01-13
Supplement: Supplementary file 1 [file 0ad20e2a285a7e3f9d8a3733.docx]

Supplementary

Prompts

Prompt for Literature review, Fig.2

“Create a visually compelling infographic that clearly illustrates the information from the following paragraph: (text of Literature review part) Present the concepts visually through diagrams, symbols, or simplified illustrations, while keeping the style modern and easy to read.”

Prompt for Materials and Methods, Fig.3

“Create a visually compelling flow chart that clearly illustrates the information from the following paragraph: (text of Materials and Methods part). Present the concepts visually through diagrams, symbols, or simplified illustrations, while keeping the style modern and easy to read.”
